# Supplementary material
Source: publisher figshare collection journal article supplement (https://acs.figshare.com/ndownloader/files/4189498)
Supplement: Supplementary file 1 [file 4189498]

# Supporting Information for “Photoactive Memory by a Si-Nanowire Field-Effect-Transistor”

*Chung-Jin Kim, Sung-Jin Choi, Jae-Hyuk Ahn, Jin-Woo Han, Hoyeon Kim, Seunghyup Yoo,  
and Yang-Kyu Choi*

Department of Electrical Engineering, KAIST, 291 Daehak-ro, Republic of Korea

## 1. Process flow of the photoactive Si-NW device

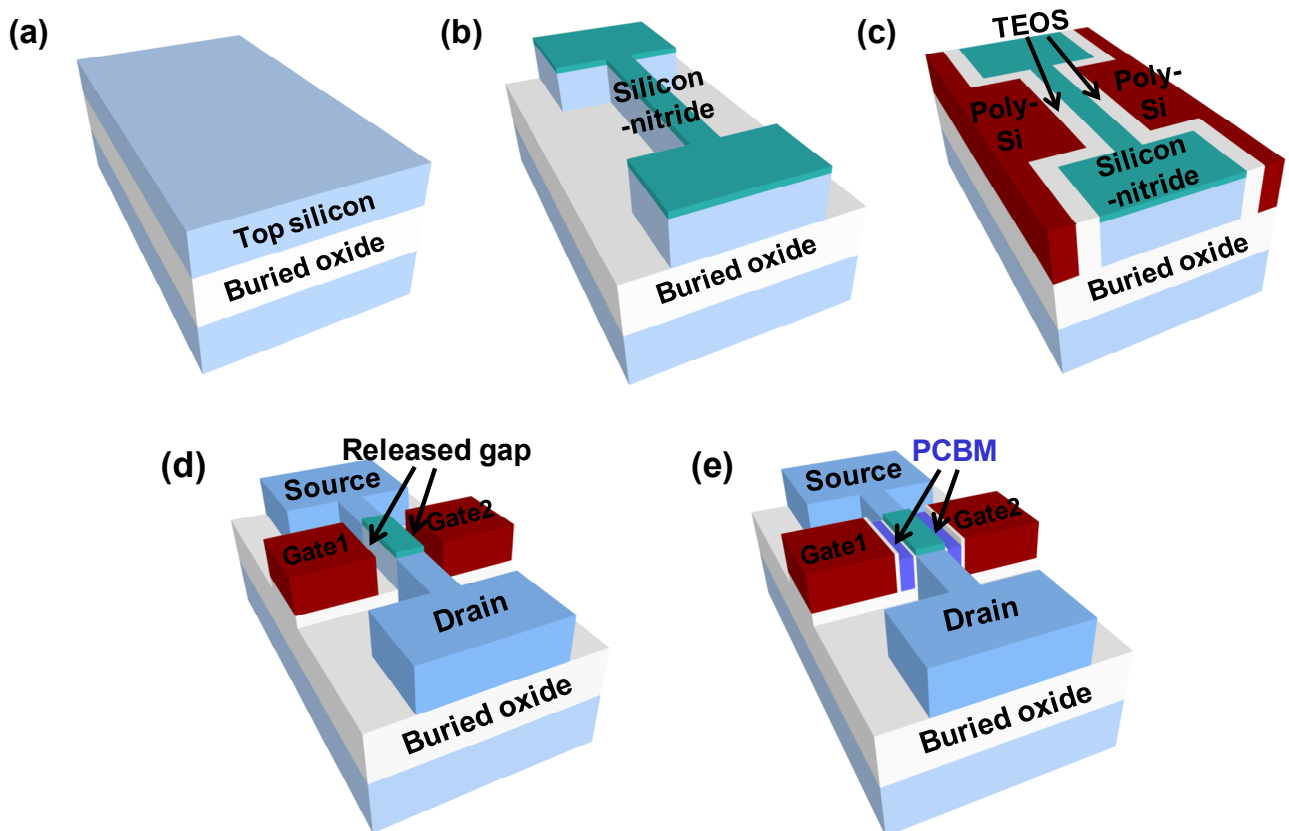

**Figure S1.** The fabrication process flow of the photoactive Si-NW FET. (a) Starting SOI wafer (b) Deposition of silicon nitride as a hard mask and NW formation (c) Deposition of TEOS and poly-silicon, chemical-mechanical polishing (d) Gate patterning, source/drain implantation and nanogap creation by wet-etchant (e) Re-oxidation (white and thin layer) and PCBM dipping

## 2. Effect of white-light alone

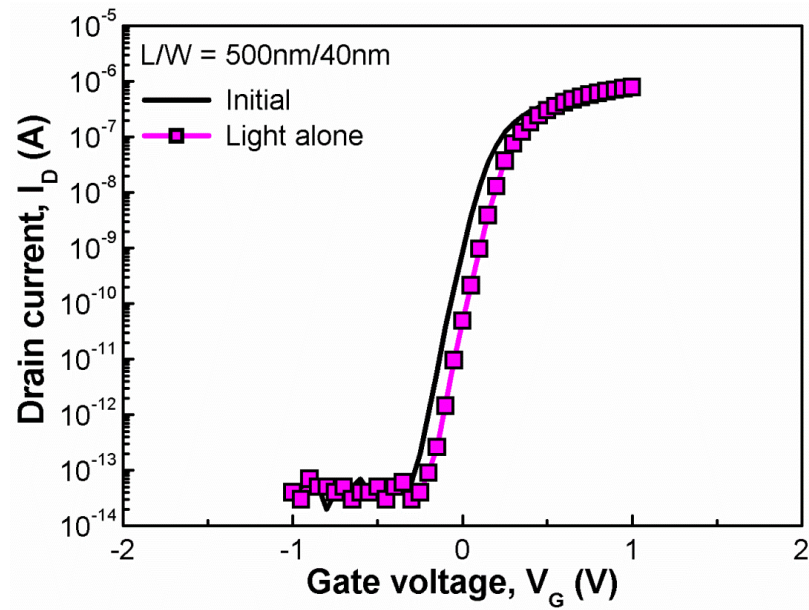

**Figure S2.** Comparison of  $I_D$ - $V_G$  characteristic in a photoactive Si-NW FET before and after applying white light alone.

### 3. Device scalability according to the gate mode

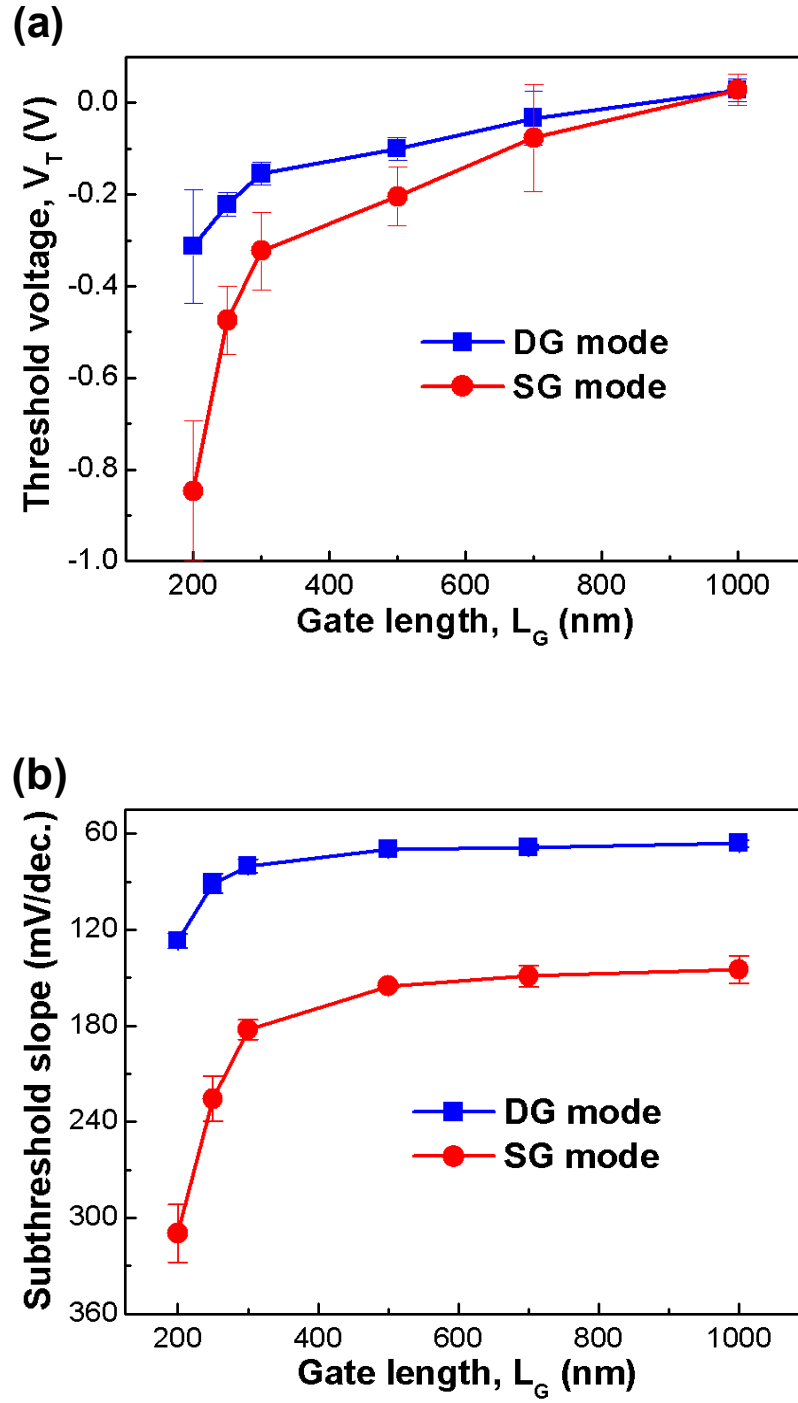

**Figure S3.** (a)  $V_T$  change and (b) subthreshold slope to investigate the immunity against short-channel-effect according to the gate length for SG and DG modes

#### 4. The program and erase characteristics in Si-NW photoactive memory

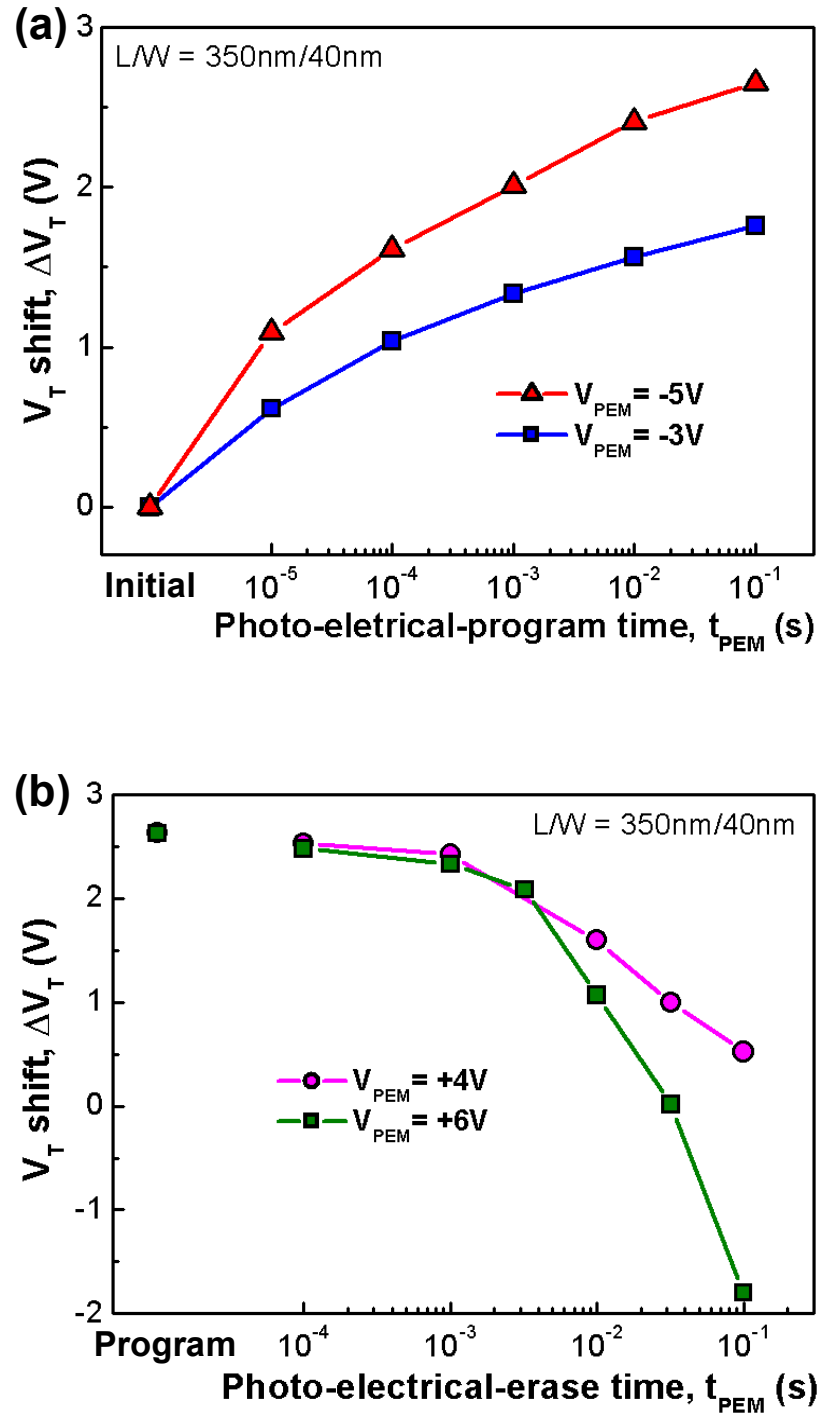

Figure S4. (a) Program and (b) erase speed characteristics

## 5. Repeatability characteristics

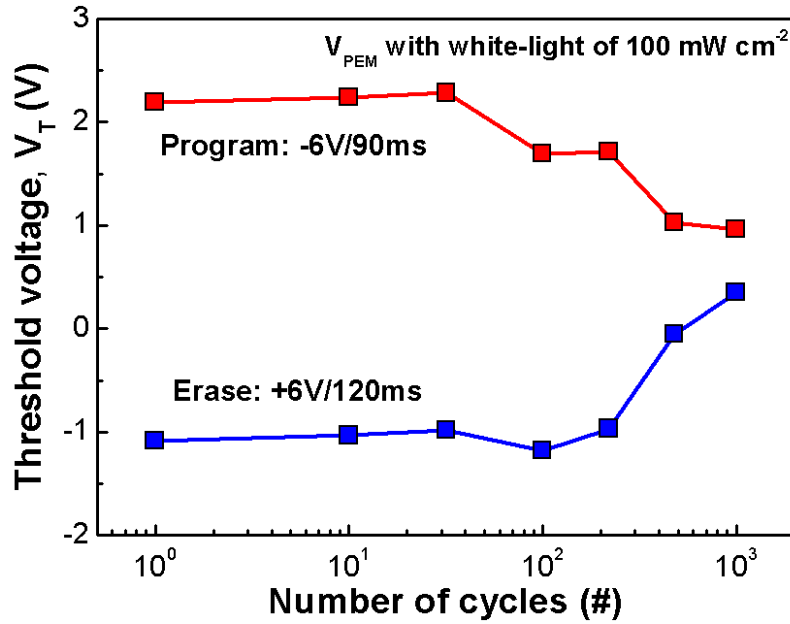

Figure S5. Repeatability characteristics after program/erase cycles

## 6. Simulation proof of independently-controlled double-gate structure

Figure S6 explains the mechanism of the independently-controlled gate. Using a commercially available numerical simulation,<sup>1</sup> the charges are artificially distributed and the resultant  $V_T$  is extracted. If the charges are located close to the drive gate, as shown in Figure S6a, they only contribute to the  $V_T$  shift, proportional to the increased charge amount, similar to a typical Flash memory (Figure S6c). It should be noted that the  $V_T$  shift is not influenced by Gate 2 bias, because all the charges are located at the side of the drive gate. If the charges are located close to the opposite gate (*i.e.*, the supporting gate) (Figure S6b), however, the  $V_T$  does not follow this kind of linear behavior. First, as shown in Figure S6c, the  $V_T$  increases faster than the case of charges close to the drive gate, and is then gradually saturated. This  $V_T$  trend is the same as the  $V_T$  change, which is read with the SG mode before photo-electrical-

program, according to the Gate 2 bias shown in Figure S6d. In other words, charges close to the supporting gate play a role as a negatively-biased gate, *i.e.*, negative optical gating.<sup>2</sup> Through the DG photo-electrical-program, charges are generated at both sides of PCBM simultaneously, and these charges result in a synergetic  $V_T$  shift, which is the combined effect of charges at each side, with the aid of the independent gate structure.

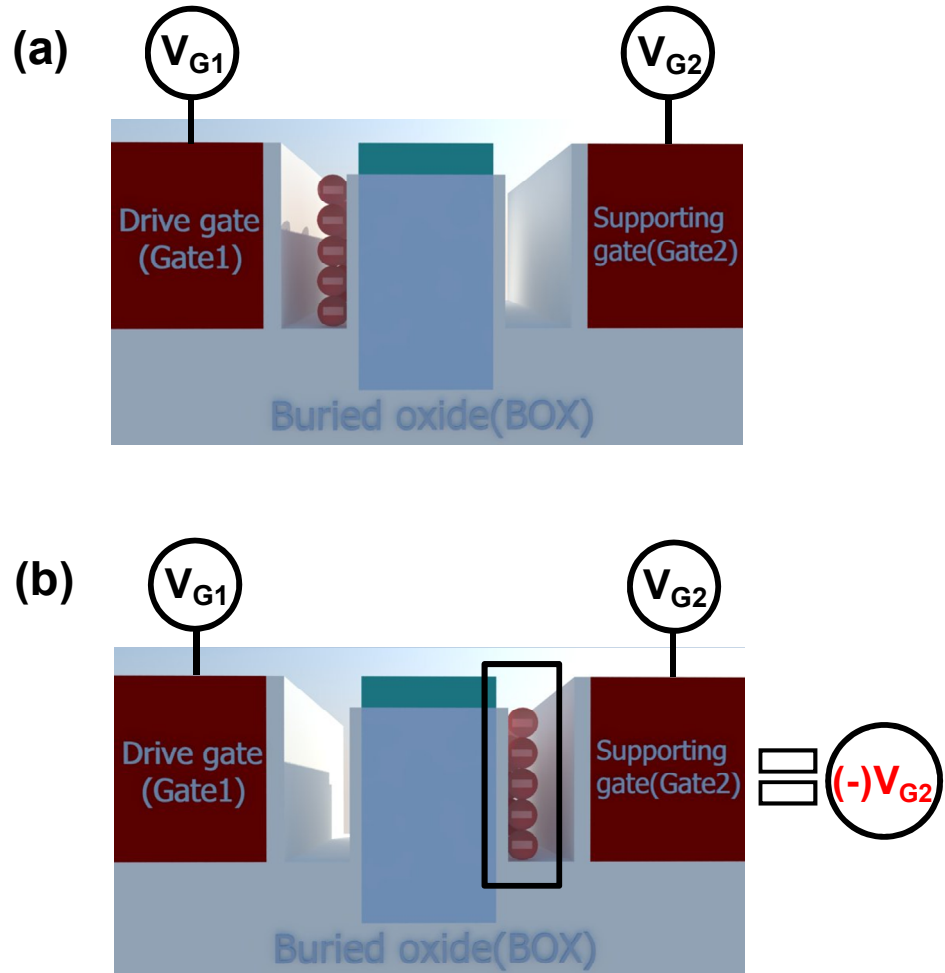

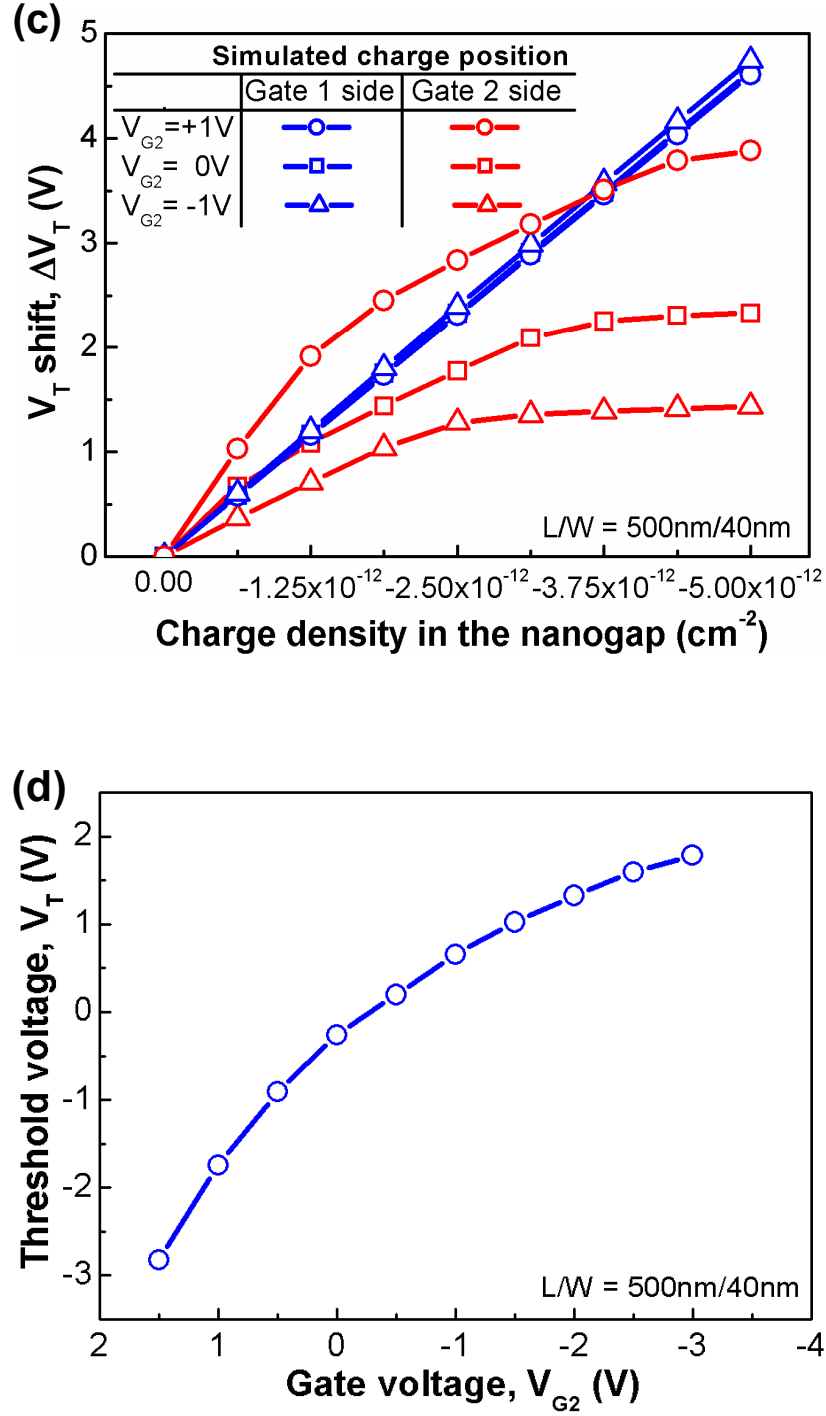

**Figure S6.** Schematic of the charges located close to the (a) drive gate and (b) supportive gate. The charges in the case of (b) play the part of a negatively biased supportive gate. (c)  $V_T$  read margin according to the charge amount to verify the role of each gate according to the position of charges implemented with numerical simulations. (d)  $V_T$  change according to Gate 2 voltage in the photoactive Si-NW FET read with the SG mode before the photo-electrical-program.

## REFERENCES

- (1) ATLAS User's Manual. *SILVACO Inc.*, CA, **2008**.
- (2) Borghetti, J.; Derycke, V.; Lenfant, S.; Chenevier, P.; Filoramo, A.; Goffman, M.; Vuillaume, D.; Bourgoin, J. P. Optoelectronic Switch and Memory Devices Based on Polymer-Functionalized Carbon Nanotube Transistors. *Adv. Mater.* **2006**, *18*, 2535-2540.
